## **Correction: Adaptive, Fast Walking in a Biped Robot under Neuronal Control and Learning**

Poramate Manoonpong, Tao Geng, Tomas Kulvicius, Bernd Porr, Florentin Wörgötter

doi:10.1371/journal.pcbi.0030134

In Figure 1F, the number 0.24 should be 2.4 instead. The incorrect Froude number given for human walking (0.24) corresponds to 1.5m/s, which is closer to the preferred speed of human walking. The correct number now given (2.4) corresponds to a speed of about 4.6m/s.

The incorrect Figure 1 is found at: doi:10.1371/journal.pcbi.0030134.g001.

This correction note may be found online at doi:10.1371/journal.pcbi.0030191

Received: August 17, 2007; Accepted: August 17, 2007; Published: August 31, 2007.

Citation: Manoonpong P, Geng T, Kulvicius T, Porr B, Wörgötter F (2007) Correction: Adaptive, Fast Walking in a Biped Robot under Neuronal Control and Learning. PLoS Comput Biol 3(9): e191.

doi:10.1371/journal.pcbi.0030191
